# Supplementary material
Source: MDPI journal article supplement (https://www.mdpi.com/2410-3888/7/6/348)
Supplement: s1 [file s1]

# Seasonal Variation of Biochemical Composition and Non-Volatile Taste Active Compounds in Pearl Oyster *Pinctada fucata martensii* from Two Selective Strains

Xingzhi Zhang <sup>1,2</sup>, Peng Ren <sup>2</sup>, Junliang Guan <sup>3</sup>, Zhifeng Gu <sup>2</sup>, Yi Yang <sup>2</sup>, Aimin Wang <sup>1</sup> and Chunsheng Liu <sup>1,2,\*</sup>

<sup>1</sup> State Key Laboratory of Marine Resource Utilization in South China Sea, Hainan University, Haikou 570228, China

<sup>2</sup> College of Marine Science, Hainan University, Haikou 570228, China

<sup>3</sup> Guangxi Key Laboratory of Aquatic Genetic Breeding and Healthy Aquaculture, Guangxi Academy of Fisheries Sciences, Nanning 530021, China

\* Correspondence: lcs5113@163.com; Tel.: +86-0898-66279184

**Table S1.** Significance levels of Two-way ANOVAs between strain and sampling season for pearl oyster biological characteristics, biochemical composition and non-volatile taste active compounds.

| Items                             | Two-Way ANOVA (P-value) |        |             |
|-----------------------------------|-------------------------|--------|-------------|
|                                   | Strain                  | Season | Interaction |
| <b>Biological characteristics</b> |                         |        |             |
| Shell height (mm)                 | 0.000                   | 0.007  | 0.351       |
| Shell width index                 | 0.000                   | 0.000  | 0.573       |
| Wet body weight (g)               | 0.003                   | 0.016  | 0.898       |
| Ratio of soft tissues (%)         | 0.001                   | 0.000  | 0.021       |
| <b>Proximate compositions</b>     |                         |        |             |
| Moisture                          | 0.983                   | 0.006  | 0.009       |
| Ash                               | 0.052                   | 0.034  | 0.426       |
| Crude protein                     | 0.273                   | 0.045  | 0.357       |
| Crude lipid                       | 0.022                   | 0.002  | 0.088       |
| Glycogen                          | 0.272                   | 0.001  | 0.041       |
| <b>Amino acids</b>                |                         |        |             |
| Lysine*                           | 0.305                   | 0.354  | 0.014       |
| Valine*                           | 0.110                   | 0.694  | 0.030       |
| Phenylalanine*                    | 0.523                   | 0.352  | 0.622       |
| Methionine*                       | 0.536                   | 0.314  | 0.603       |
| Leucine*                          | 0.067                   | 0.551  | 0.024       |
| Isoleucine*                       | 0.158                   | 0.536  | 0.101       |
| Threonine*                        | 0.831                   | 0.246  | 0.880       |
| Tryptophan*                       | 0.383                   | 0.353  | 0.381       |
| EAA                               | 0.975                   | 0.265  | 0.557       |
| Glutamic acid                     | 0.844                   | 0.162  | 0.535       |
| Glycine                           | 0.469                   | 0.227  | 0.037       |
| Aspartic acid                     | 0.825                   | 0.162  | 0.390       |
| Alanine                           | 0.174                   | 0.539  | 0.039       |
| Tyrosine                          | 0.525                   | 0.352  | 0.616       |
| Serine                            | 0.101                   | 0.189  | 0.027       |
| Histidine                         | 0.393                   | 0.362  | 0.411       |
| Arginine                          | 0.212                   | 0.867  | 0.067       |
| Proline                           | 0.814                   | 0.258  | 0.850       |

|                    |       |       |       |
|--------------------|-------|-------|-------|
| Cysteine           | 0.438 | 0.379 | 0.425 |
| NEAA               | 0.828 | 0.214 | 0.781 |
| TAA                | 0.874 | 0.229 | 0.705 |
| <b>Fatty acids</b> |       |       |       |
| C12:0              | 0.001 | 0.000 | 0.002 |
| C14:0              | 0.162 | 0.078 | 0.022 |
| C15:0              | 0.081 | 0.103 | 0.024 |
| C16:0              | 0.035 | 0.026 | 0.027 |
| C17:0              | 0.093 | 0.081 | 0.089 |
| C18:0              | 0.072 | 0.771 | 0.031 |
| C20:0              | 0.964 | 0.066 | 0.093 |
| ΣSFA               | 0.096 | 0.262 | 0.035 |
| C16:1n-9           | 0.480 | 0.040 | 0.028 |
| C18:1n-9           | 0.296 | 0.343 | 0.055 |
| C20:1n-9           | 0.574 | 0.029 | 0.864 |
| ΣMUFA              | 0.563 | 0.599 | 0.041 |
| C18:2n-6           | 0.285 | 0.016 | 0.119 |
| C20:2n-6           | 0.185 | 0.340 | 0.047 |
| C20:2n-7           | 0.662 | 0.805 | 0.334 |
| C18:3n-3           | 0.115 | 0.008 | 0.064 |
| C18:3n-6           | 0.146 | 0.008 | 0.009 |
| C20:4n6 ARA        | 0.034 | 0.649 | 0.038 |
| C20:5n-3 EPA       | 0.079 | 0.001 | 0.263 |
| C22:5n3            | 0.068 | 0.003 | 0.144 |
| C22:6n3 DHA        | 0.073 | 0.002 | 0.140 |
| ΣPUFA              | 0.063 | 0.005 | 0.096 |
| Σn-3               | 0.066 | 0.001 | 0.147 |
| Σn-6               | 0.035 | 0.737 | 0.034 |
| <b>FAAs</b>        |       |       |       |
| Aspartic acid      | 0.011 | 0.008 | 0.599 |
| Glutamic acid      | 0.000 | 0.000 | 0.226 |
| Umami FAA          | 0.000 | 0.000 | 0.641 |
| Serine             | 0.001 | 0.841 | 0.000 |
| Glycine            | 0.002 | 0.011 | 0.295 |
| Threonine          | 0.006 | 0.018 | 0.287 |
| Alanine            | 0.001 | 0.066 | 0.012 |
| Arginine           | 0.000 | 0.002 | 0.460 |
| Valine             | 0.002 | 0.014 | 0.027 |
| Lysine             | 0.000 | 0.000 | 0.000 |
| Proline            | 0.004 | 0.000 | 0.008 |
| Sweet FAA          | 0.001 | 0.003 | 0.656 |
| Histidine          | 0.035 | 0.005 | 0.035 |
| Phenylalanine      | 0.029 | 0.074 | 0.225 |
| Isoleucine         | 0.001 | 0.002 | 0.014 |
| Leucine            | 0.001 | 0.001 | 0.019 |
| Methionine         | 0.022 | 0.007 | 0.075 |
| Tryptophan         | 0.313 | 0.004 | 0.596 |
| Bitter FAA         | 0.001 | 0.000 | 0.016 |
| Taurine            | 0.053 | 0.046 | 0.007 |
| Total FAA          | 0.001 | 0.000 | 0.001 |
| <b>Nucleotides</b> |       |       |       |

---

|                                  |       |       |       |
|----------------------------------|-------|-------|-------|
| CMP                              | 0.684 | 0.112 | 0.406 |
| GMP                              | 0.376 | 0.012 | 0.035 |
| AMP                              | 0.032 | 0.017 | 0.093 |
| Total nucleotides                | 0.028 | 0.012 | 0.071 |
| <hr/>                            |       |       |       |
| <b>Organic acids and betaine</b> |       |       |       |
| Succinic acid                    | 0.493 | 0.107 | 0.887 |
| Malic acid                       | 0.051 | 0.002 | 0.113 |
| Citric acid                      | 0.255 | 0.209 | 0.210 |
| Betaine                          | 0.004 | 0.000 | 0.289 |

---
